# Supplementary material for: Achieving efficient uranium extraction by in situ ultrasonic texturization of commercial Fe powder
Source: Royal Society of Chemistry journal article supplement (doi:10.1039/d3en00269a), 2023-01-01
Supplement: d3en00269a1.pdf [file d3en00269a1.pdf]

## Supplementary Information

### **Achieving Efficient Uranium Extraction by In-situ Ultrasonic Texturization of Commercial Fe Powder**

Boming Zhu<sup>1</sup>, Hongwei Wu<sup>2</sup>, Jie Kang<sup>2</sup>, Xiaofang Yu<sup>3</sup>, Tao Chen<sup>1</sup>, Ru Cheng<sup>1</sup>, Guolin Yang<sup>1</sup>,  
Wencai Bai<sup>1</sup>, Wenkun Zhu<sup>1\*</sup>, Rong He<sup>1\*</sup>

*<sup>1</sup>State Key Laboratory of Environment-friendly Energy Materials, School of National Defense Science and Technology, School of Life Science and Engineering, National Co-innovation Center for Nuclear Waste Disposal and Environmental Safety, Southwest University of Science and Technology, Mianyang, 621010, PR China*

*<sup>2</sup>CNNC Lanzhou Uranium Enrichment Co., Ltd. Lanzhou, 730065, PR China*

*<sup>3</sup>Institute of Nuclear Physics and Chemistry, China Academy of Engineering Physics, Mianyang, 621900, PR China*

\*Corresponding authors.

E-mail addresses: zhuwenkun@swust.edu.cn (Wenkun. Zhu), her@swust.edu.cn (Rong. He).

---

**content**

Supplementary Figure S1 .....3  
Supplementary Figure S2. ....4  
Supplementary Figure S3. ....5  
Supplementary Figure S4. ....6  
Supplementary Figure S5. ....7  
Supplementary Figure S6 .....8  
Supplementary Figure S7. ....9  
Supplementary Figure S8. ....10  
Supplementary Figure S9. ....11  
Supplementary Figure S10. ....12  
Supplementary Figure S11. ....13

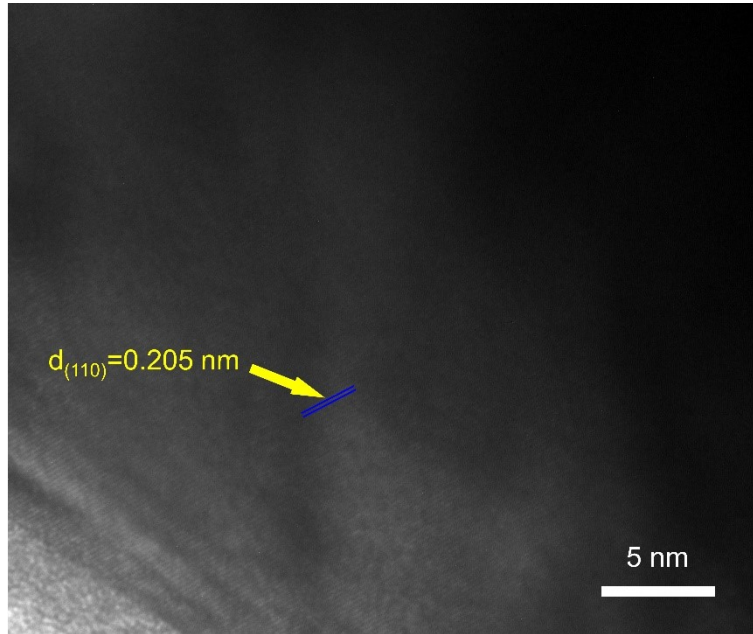

**Figure S1.** The HRTEM images of the inner part of commercial Fe powders.

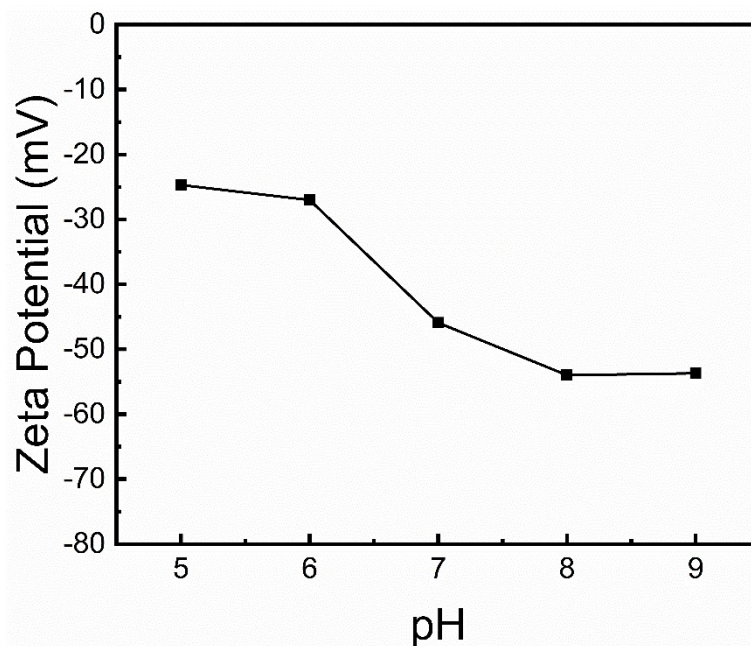

**Figure S2.** zeta potential of commercial Fe powder at pH 5-9.

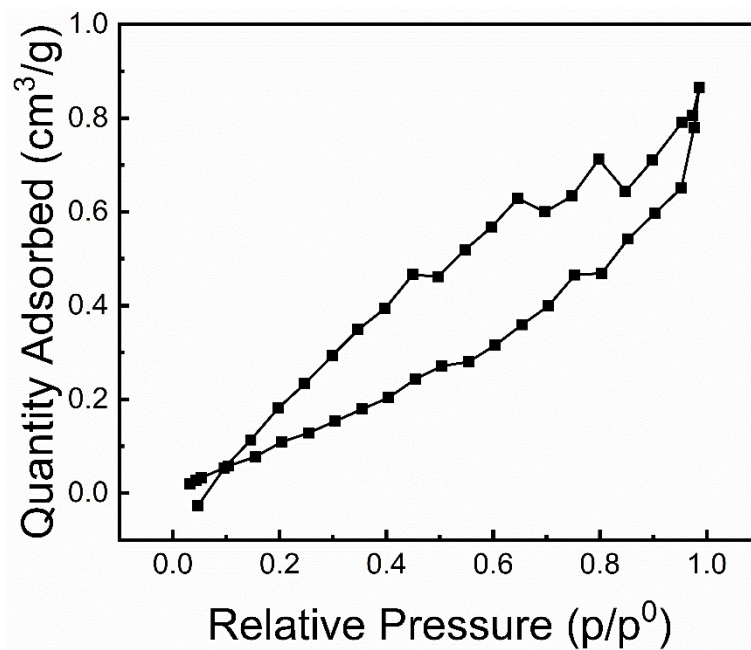

**Figure S3.** N<sub>2</sub> isothermal adsorption and desorption curve of commercial Fe powder.

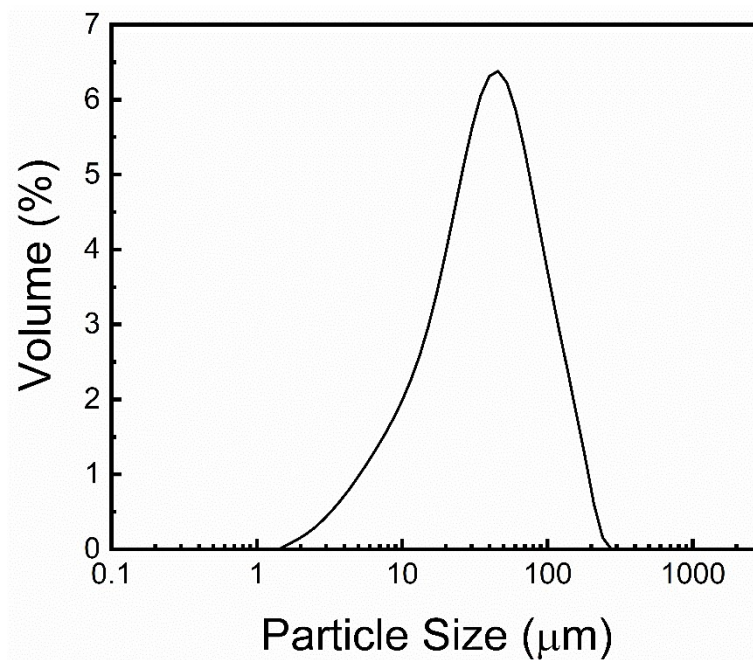

**Figure S4.** Particle size distribution curve of commercial Fe powder.

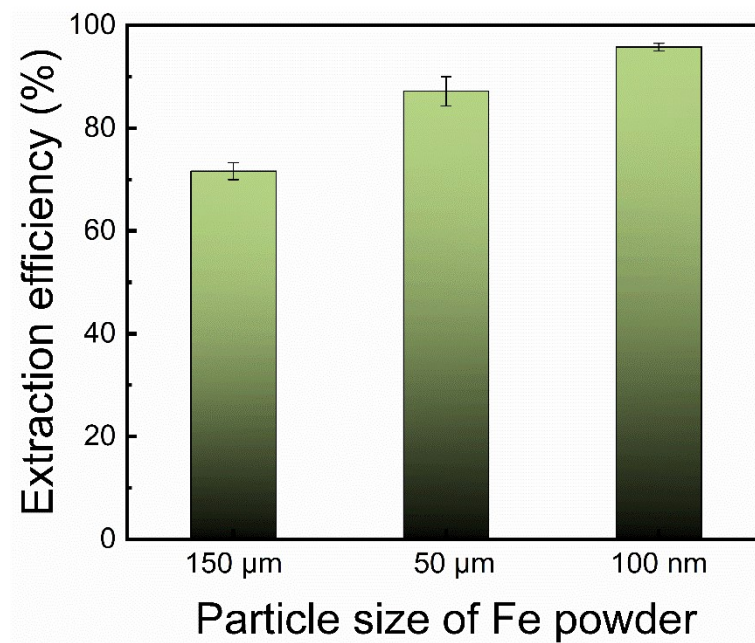

**Figure S5.** The extraction efficiency of U(VI) by ultrasonic coupling Fe powder with different particle sizes at 120 min (Fe powder dose: 5 mg).

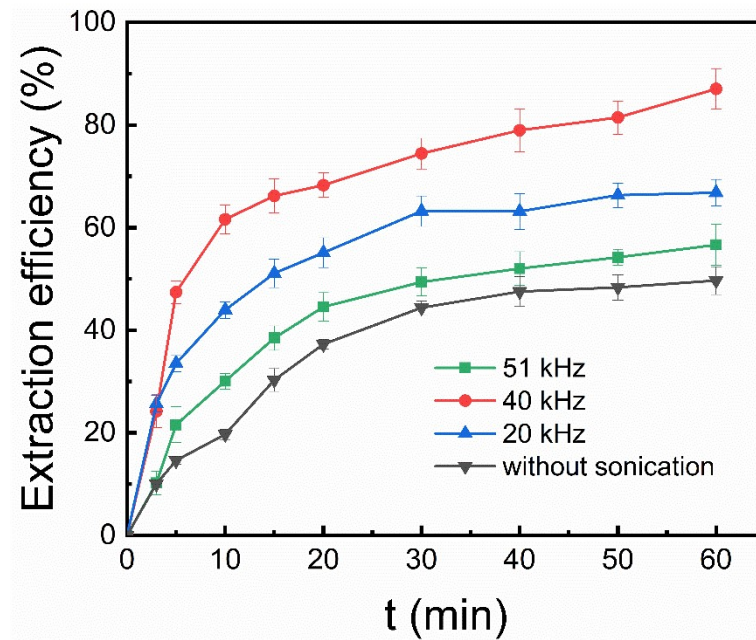

**Figure S6.** Effects of different ultrasonic frequencies on the extraction efficiency of U(VI).



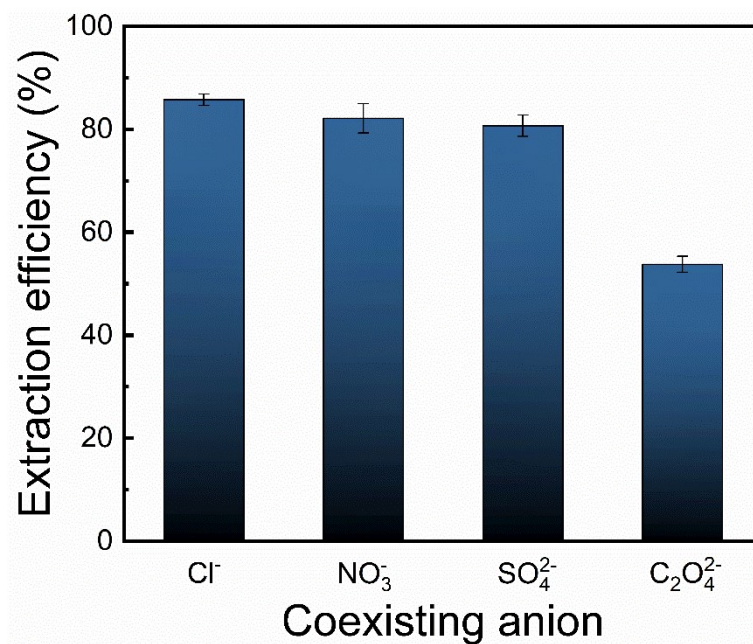

**Figure S7.** U(VI) extraction efficiency at 120 min under different coexisting anions.

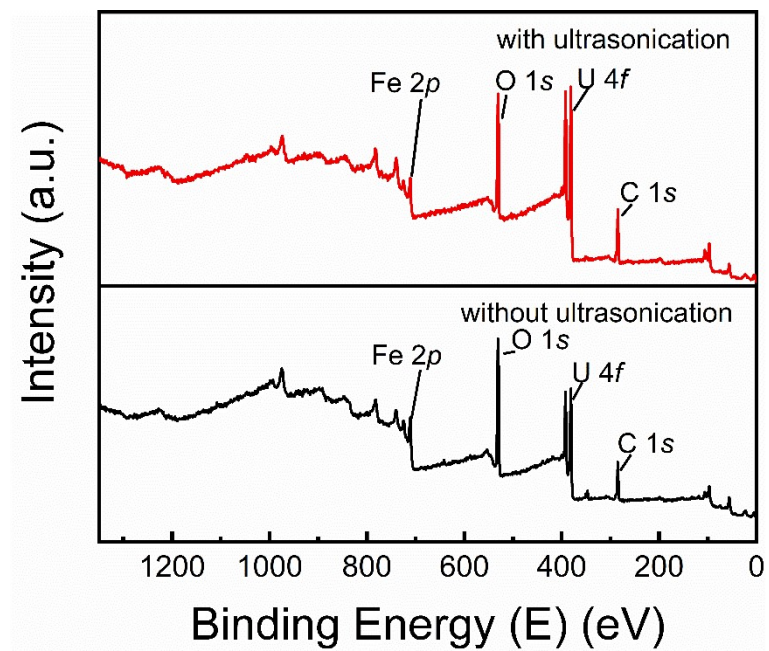

**Figure S8.** XPS spectra of Fe powder with and without ultrasonication after the reaction.

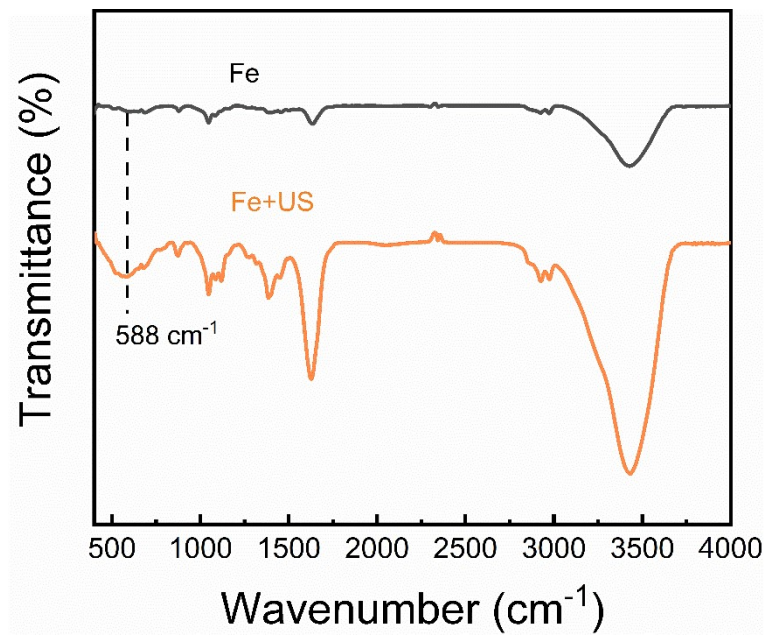

**Figure S9.** FTIR spectra of commercial Fe powder before and after the reaction.

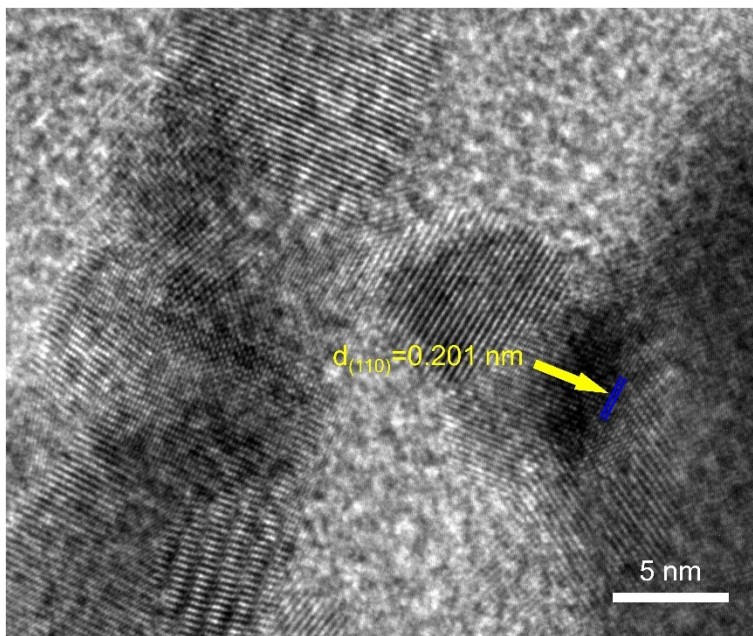

**Figure S10.** The HRTEM images of the nanoparticles exfoliated from the commercial Fe powder for 15min reaction.

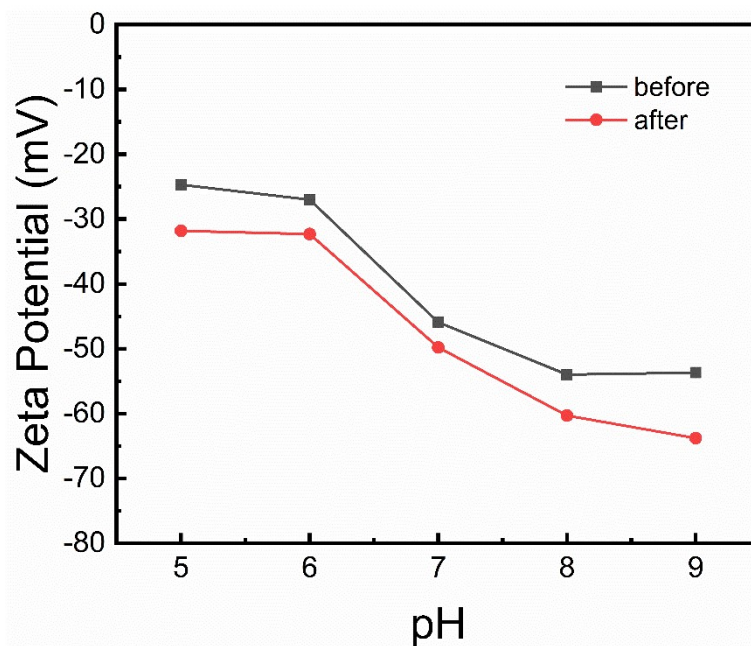

**Figure S11.** zeta potential of commercial Fe powder before and after the reaction.
